# Supplementary material
Source: ML conference proceedings conference paper supplement (https://openreview.net/forum?id=bAXmvOLtjA)
Supplement: supplementary_material [file attachment]

## A ORGANIZATION

This appendix is organized as follows.

- Appendix [B](#) contains further experimental results.
- Appendix [C](#) contains experimental details about datasets and hyperparameters.

## B FURTHER RESULTS

Table 3: Extended results for 3D environments – all ablations shown. Unconditional refers to DWM generating trajectories in ‘action-unconditional’ mode.

| Method                                                  | CS:GO |       |         | Driving |        |         | Sample rate<br>(Hz) ↑ | Parameters<br>(#) |
|---------------------------------------------------------|-------|-------|---------|---------|--------|---------|-----------------------|-------------------|
|                                                         | FID ↓ | FVD ↓ | LPIPS ↓ | FID ↓   | FVD ↓  | LPIPS ↓ |                       |                   |
| DreamerV3                                               | 106.8 | 509.1 | 0.173   | 167.5   | 733.7  | 0.160   | 266.7                 | 181M              |
| IRIS ( $K = 16$ )                                       | 24.5  | 110.1 | 0.129   | 51.4    | 368.7  | 0.188   | 4.2                   | 123M              |
| IRIS ( $K = 64$ )                                       | 22.8  | 85.7  | 0.116   | 44.3    | 276.9  | 0.148   | 1.5                   | 111M              |
| DWM frame-stack, $\mathcal{T} = 20$                     | 9.6   | 34.8  | 0.107   | 16.7    | 80.3   | 0.058   | 7.4                   | 122M              |
| DWM frame-stack, $\mathcal{T} = 20$ , CFG $w = 1.0$     | 9.7   | 35.1  | 0.108   | 17.6    | 81.5   | 0.059   | 3.7                   | 122M              |
| DWM frame-stack, $\mathcal{T} = 20$ , CFG $w = 2.0$     | 42.7  | 315.5 | 0.161   | 100.8   | 1228.6 | 0.198   | 3.7                   | 122M              |
| DWM frame-stack, $\mathcal{T} = 20$ , unconditional     | 10.1  | 44.3  | 0.120   | 16.7    | 78.7   | 0.058   | 7.4                   | 122M              |
| DWM frame-stack, $\mathcal{T} = 10$                     | 14.2  | 60.9  | 0.107   | 23.1    | 100.9  | 0.058   | 14.8                  | 122M              |
| DWM cross-attention, $\mathcal{T} = 20$                 | 11.6  | 81.4  | 0.125   | 35.2    | 299.9  | 0.119   | 2.5                   | 184M              |
| DWM cross-attention, $\mathcal{T} = 20$ , CFG $w = 1.0$ | 11.6  | 85.8  | 0.125   | 36.6    | 291.5  | 0.119   | 1.2                   | 184M              |
| DWM cross-attention, $\mathcal{T} = 20$ , CFG $w = 2.0$ | 13.1  | 99.1  | 0.140   | 107.5   | 1977.0 | 0.235   | 1.2                   | 184M              |
| DWM cross-attention, $\mathcal{T} = 20$ , unconditional | 11.7  | 93.9  | 0.131   | 36.5    | 297.4  | 0.123   | 2.5                   | 184M              |
| DWM cross-attention, $\mathcal{T} = 10$                 | 17.9  | 89.9  | 0.125   | 50.7    | 263.3  | 0.119   | 5.0                   | 184M              |

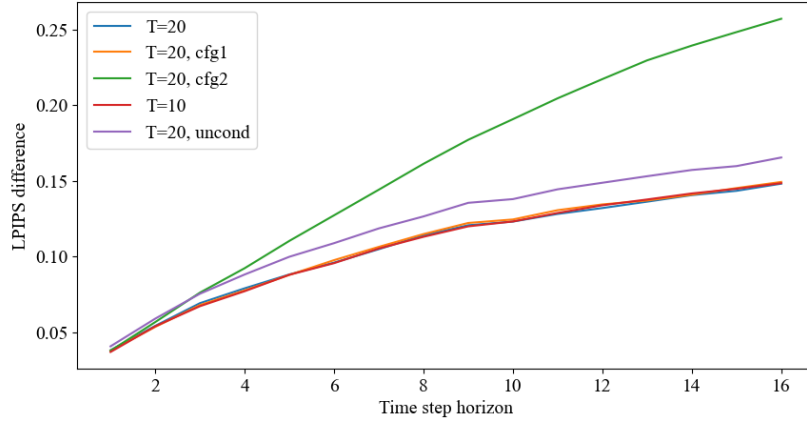

Figure 5: This figure visualizes how the LPIPS increases for increasing prediction horizon. DWM frame-stack shown on CS:GO under various sampling choices.

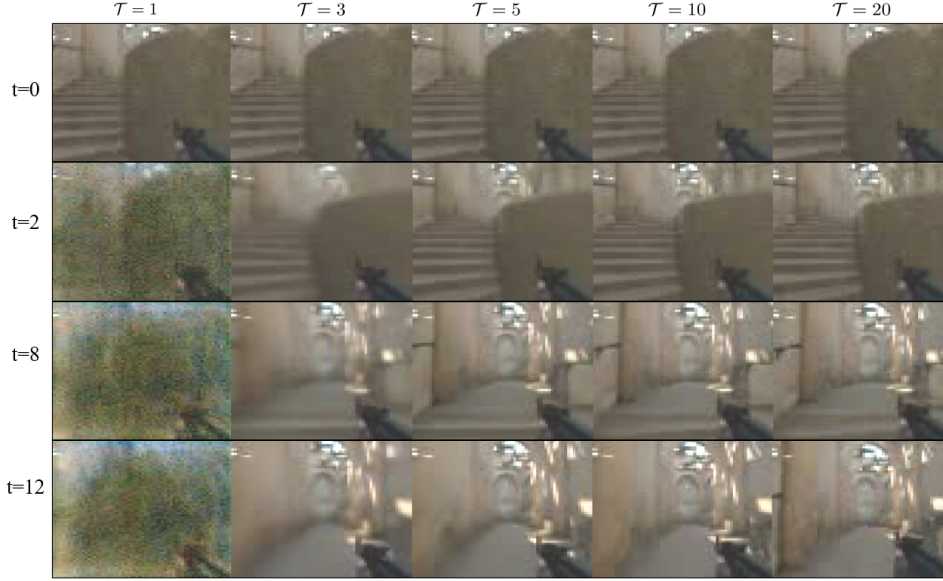

Figure 6: Effect of number of diffusion sampling steps,  $\mathcal{T}$ , on visual quality of generated observations. Diffusion world model frame-stack, CS:GO. Note the blur on the left-hand side of the generated image when  $\mathcal{T} = 3$ , and that the observations almost immediately collapse into noise when  $\mathcal{T} = 1$ . This was not the case for Atari, where very low sampling steps were successful.

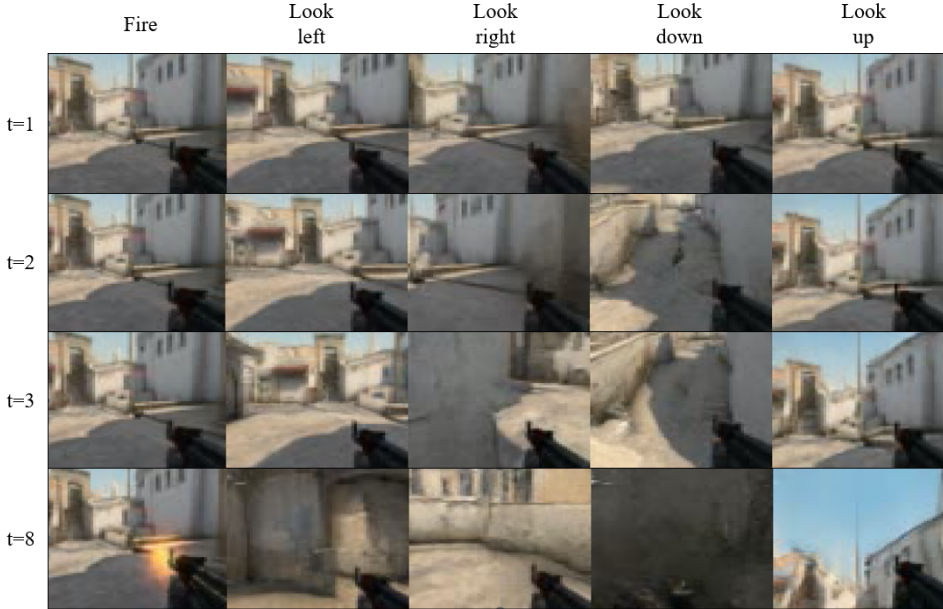

Figure 7: Effect of fixed actions on sampled trajectories. Diffusion world model frame-stack, CS:GO. Conditioned on the same initial observation, we rollout the model applying differing actions. Whilst in immediate frames these have the intended effect, for longer roll-outs the observations can degenerate. For instance, it would have been very unlikely for the human demonstrator to look directly into ground in this game state, so the world model is unable to generate a plausible trajectory here, and instead snaps onto another area of the map when looking down does make sense.

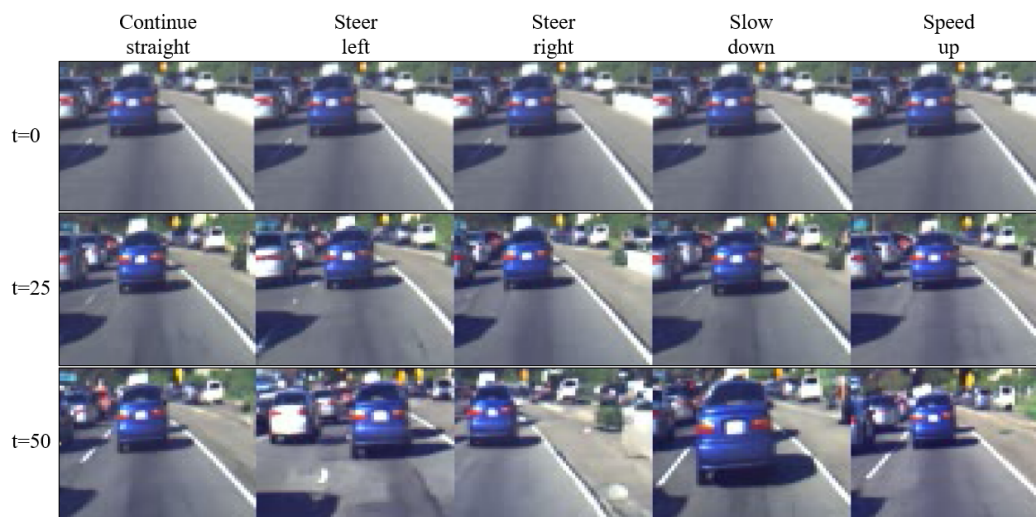

Figure 8: Effect of user-input actions on sampled trajectories. Conditioned on the same initial observations, we rollout the model applying differing actions. Note that 'Slow down' and 'Speed up' correspond to the whole traffic slowing down and speeding up.

## C EXPERIMENTAL DETAILS

### C.1 ATARI

Table 4: Hyperparameters for diffusion world model, Atari.

| Hyperparameter                       | Value                       |
|--------------------------------------|-----------------------------|
| <b>Data</b>                          |                             |
| Image observation dimension          | $64 \times 64 \times 3$     |
| Action space                         | Discrete (up to 18 actions) |
| <b>Model</b>                         |                             |
| Number previous observations ( $H$ ) | 4                           |
| Number previous actions              | 4                           |
| Prob mask actions                    | 0.0                         |
| Prob mask observation history        | 0.0                         |
| Residual blocks                      | [2, 2, 2, 2]                |
| U-Net channels                       | [64, 64, 64, 64]            |
| Conditioning mechanism               | Frame stacking              |
| <b>Optimization</b>                  |                             |
| Updates                              | 422k                        |
| Batchsize                            | 32                          |
| Learning rate                        | $1e-4$                      |
| Weight decay                         | $1e-2$                      |
| Optimizer                            | AdamW                       |
| <b>Sampling</b>                      |                             |
| Sampler                              | 1-step sampling             |
| <b>Data Augmentation</b>             |                             |
| Contrast                             | None                        |
| Brightness                           | None                        |
| Saturation                           | None                        |
| Horizontal flip probability          | None                        |
| Random shift                         | None                        |
| <b>RI in imagination</b>             |                             |
| Updates                              | 422k                        |
| Batchsize                            | 32                          |
| Learning rate                        | $1e-4$                      |
| Weight decay                         | $1e-2$                      |
| Optimizer                            | AdamW                       |
| Imagination horizon                  | 20                          |
| Reward clipping                      | $\{-1, 0, 1\}$              |
| $\gamma$                             | 0.997                       |
| $\lambda$                            | 0.95                        |
| Weight of entropy regularizer        | 0.001                       |

## C.2 CS:GO

Table 5: Hyperparameters for diffusion world model, CS:GO.

| Hyperparameter                       | Value                                      |
|--------------------------------------|--------------------------------------------|
| <b>Data</b>                          |                                            |
| Image observation dimension          | $64 \times 64 \times 3$                    |
| Action dimension                     | 9                                          |
|                                      | Continuous: mouse x, mouse y               |
|                                      | Discrete: left click, w, a, s, d, space, r |
| <b>Model</b>                         |                                            |
| Number previous observations ( $H$ ) | 6                                          |
| Number previous actions              | 1                                          |
| Prob mask actions                    | 0.5                                        |
| Prob mask observation history        | 0.5                                        |
| Residual blocks                      | [2, 4, 4, 4]                               |
| U-Net channels                       | [128, 256, 512, 512]                       |
| Self-attention?                      | [No, Yes, Yes, Yes]                        |
| Cross-attention (when applicable)?   | [No, No, Yes, Yes]                         |
| <b>Optimization</b>                  |                                            |
| Updates                              | 120k                                       |
| Batchsize                            | 64                                         |
| Learning rate                        | $1e-4$                                     |
| Weight decay                         | $1e-3$                                     |
| Optimizer                            | AdamW                                      |
| <b>Sampling</b>                      |                                            |
| Sampler                              | LMS                                        |
| <b>Data Augmentation</b>             |                                            |
| Contrast                             | None                                       |
| Brightness                           | None                                       |
| Saturation                           | None                                       |
| Horizontal flip probability          | None                                       |
| Random shift                         | None                                       |

## C.3 MOTORWAY DRIVING

Table 6: Hyperparameters for diffusion world model, motorway driving.

| Hyperparameter                       | Value                          |
|--------------------------------------|--------------------------------|
| <b>Data</b>                          |                                |
| Image observation dimension          | $64 \times 64 \times 3$        |
| Action dimension                     | 2                              |
|                                      | Continuous: steer angle, accel |
| <b>Model</b>                         |                                |
| Number previous observations ( $H$ ) | 6                              |
| Number previous actions              | 1                              |
| Prob mask actions                    | 0.2                            |
| Prob mask observation history        | 0.2                            |
| Residual blocks                      | [2, 4, 4, 4]                   |
| U-Net channels                       | [128, 256, 512, 512]           |
| Self-attention?                      | [No, Yes, Yes, Yes]            |
| Cross-attention (when applicable)?   | [No, No, Yes, Yes]             |
| <b>Optimization</b>                  |                                |
| Updates                              | 120k                           |
| Batchsize                            | 64                             |
| Learning rate                        | $1e-4$                         |
| Weight decay                         | $1e-3$                         |
| Optimizer                            | AdamW                          |
| <b>Sampling</b>                      |                                |
| Sampler                              | LMS                            |
| <b>Data Augmentation</b>             |                                |
| Contrast                             | 100% – 120%                    |
| Brightness                           | 100% – 120%                    |
| Saturation                           | 100% – 120%                    |
| Horizontal flip probability          | 0.5                            |
| Random shift                         | $\pm 10\%$                     |
